# Supplementary material for: Symmetrical dimethylation of H4R3: A bridge linking DNA damage and repair upon oxidative stress
Source: PubMed Central journal article supplement — Redox Biol. 2020 Jul 24;37:101653. doi: 10.1016/j.redox.2020.101653 (PMC7767741; doi:10.1016/j.redox.2020.101653), 2020-07-24
Supplement: mmc1.pdf [file mmc1.pdf]

## **Symmetrical Dimethylation of H4R3: A Bridge Linking DNA Damage and Repair Upon Oxidative Stress**

Zhuang Ma<sup>1a</sup>, Wentao Wang<sup>1a</sup>, Shiwei Wang<sup>1</sup>, Xingqi Zhao<sup>1</sup>, Ying Ma<sup>1</sup>, Congye Wu<sup>5</sup>, Zhigang Hu<sup>1</sup>, Lingfeng He<sup>1</sup>, Feiyan Pan<sup>1\*</sup>, Zhigang Guo<sup>1\*</sup>

<sup>1</sup>Jiangsu Key Laboratory for Molecular and Medical Biotechnology, College of Life Sciences, Nanjing Normal University, 1 Wen Yuan Road, Nanjing, China 210023.

<sup>2</sup>Department of Oncology, Nanjing First Hospital, Nanjing Medical University, 68, Changle Road, Nanjing, China 210006

### **Supplementary Information**

The following file contains supplementary material for the paper “Symmetrical Dimethylation of H4R3: A Bridge Linking DNA Damage and Repair Upon Oxidative Stress”.

This file is composed of:

- Supplementary table
- Supplementary figure and relative supplementary figure legend

## Supplementary Table 1. Sequences and applications in this study

| Name             | Sequence                                                                                                                           | Application                   |
|------------------|------------------------------------------------------------------------------------------------------------------------------------|-------------------------------|
| FEN1-F           | 5'-gcaggaaagcgagggtatccF <del>aca</del> aaagtcagcgtaccata-3'<br>5'-tatggtacgctggactttgtggataccctcgcttcctgc-3'                      | LP-BER with cell lysates      |
| FEN1-F-FAM       | 5'-FAM-gcaggaaagcgagggtatccF <del>aca</del> aaagtcagcgtaccata-3'<br>5'-tatggtacgctggactttgtggataccctcgcttcctgc-3'                  | LP-BER with purified proteins |
| FEN1-FEN-FAM     | 5'-gcaggaaagcgagggtatcc-3'<br>5'-FAM-taggtt <del>gttac</del> acaagtcagcgtaccata3'<br>5'-tatggtacgctggactttgtggataccctcgcttcctgc-3' | FEN activity assay            |
| FEN1-EXO-FAM     | 5'-gcaggaaagcgagggtatcc-3'<br>5'-FAM-cacaagtcagcgtaccata-3'<br>5'-tatggtacgctggactttgtggataccctcgcttcctgc-3'                       | EXO activity assay            |
| H4R3me2s peptide | Ac-SG-Arg(me)2s-GKGGKGLGKGGAKRHRKVGG-Lys (Biotin)                                                                                  | Pulldown                      |
| H4R3 peptide     | Ac-SGRGKGGKGLGKGGAKRHRKVGG-Lys (Biotin)                                                                                            | Pulldown                      |

## Supplementary Figure

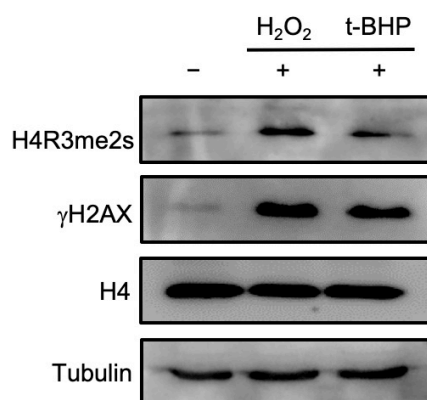

### Figure S1. tert-Butyl hydroperoxide treatment induced H4R3me2s modification.

HeLa cells were treated with 500  $\mu$ M H<sub>2</sub>O<sub>2</sub> or 500  $\mu$ M tert-Butyl hydroperoxide (t-BHP) for 30 min, and the medium was then changed to fresh medium, followed by continued culture for 4 h. Whole-cell extracts were analyzed by Western blotting with the indicated antibodies. Tubulin was served as an internal control.
